# 1 Resource misallocation as a mediator of fitness costs 2 in antibiotic resistance.

---

3 Andrej Trauner<sup>1,2,\*</sup>, Amir Banaei-Esfahani<sup>3,4</sup>, Sebastian M. Gygli<sup>1,2</sup>, Philipp Warmer<sup>3</sup>, Julia  
4 Feldmann<sup>1,2</sup>, Seyedehsara Shafieechashmi<sup>1,2</sup>, Katja Eschbach<sup>5</sup>, Mattia Zampieri<sup>3</sup>, Sonia Borrell<sup>1,2</sup>,  
5 Ben C. Collins<sup>3</sup>, Christian Beisel<sup>5</sup>, Ruedi Aebersold<sup>3,6</sup> and Sebastien Gagneux<sup>1,2,#</sup>

6

7 <sup>1</sup> Swiss Tropical and Public Health Institute, Basel, Switzerland

8 <sup>2</sup> University of Basel, Basel, Switzerland

9 <sup>3</sup> Department of Biology, Institute of Molecular and Systems Biology, ETH Zurich, Zurich,  
10 Switzerland

11 <sup>4</sup> PhD Program in Systems Biology, Life Science Zurich Graduate School, University of Zurich  
12 and ETH Zurich, Zurich, Switzerland

13 <sup>5</sup> Genomics Facility Basel, Department of Biosystems Science and Engineering, ETH Zurich,  
14 Basel, Switzerland

15 <sup>6</sup> Faculty of Science, University of Zurich, Zurich, Switzerland

16 \* [andrej.trauner@swisstph.ch](mailto:andrej.trauner@swisstph.ch)

17 # [sebastien.gagneux@swisstph.ch](mailto:sebastien.gagneux@swisstph.ch)

18

## 19 Summary

20 Antimicrobial resistance poses a threat to global health and the economy. It is widely accepted  
21 that, in the absence of antibiotics, drug resistance mutations carry a fitness cost. In the case of  
22 rifampicin resistance in fast-growing bacteria, this cost stems from a reduced transcription rate of  
23 the RNA polymerase resulting in slower ribosome biosynthesis. However, this relationship does  
24 not apply in the slow-growing *Mycobacterium tuberculosis*, where the true mechanism of fitness cost  
25 of rifampicin resistance as well as the impact of compensatory evolution remain unknown. Here  
26 we show, using global transcriptomic and proteomic profiling of selected *M. tuberculosis* mutants  
27 and clinical strains, that the fitness cost of rifampicin resistance in *M. tuberculosis* is the result of  
28 the physiological burden caused by aberrant gene expression. We further show that the perceived  
29 burden can be increased, effectively suppressing the emergence of drug resistance.

## 30 Keywords

31 Antimicrobial resistance, fitness cost, tuberculosis, proteomics, transcriptomics, epistasis,  
32 compensatory evolution, resource allocation

33

34 Antimicrobials are one of the cornerstones of modern medicine (Laxminarayan et al., 2016). The  
35 global increase of antimicrobial resistance (AMR) poses an existential threat, claiming an  
36 increasing number of lives and resources (O'Neill, 2016). We currently have access to a wide  
37 array of antibiotics, but their efficacy is waning, making safeguarding existing and future drugs a  
38 high priority. Understanding the mechanisms and drivers of AMR (Holmes et al., 2016),  
39 including the underlying biology, will be key to that process.

40 Antibiotics target essential bacterial processes. Modification of their targets is an important  
41 mechanism through which AMR emerges. It is therefore not surprising that AMR often comes  
42 with a fitness cost (Melnyk et al., 2015). Fitness cost is a broad concept capturing any negative  
43 deviation in the proliferation of a mutant from its ancestor: for example, a decreased growth rate  
44 *in vitro*, or in the case of pathogens, a decreased ability to transmit or cause disease. The  
45 physiological basis for the cost of drug resistance seems to be dependent on the antibiotic,  
46 bacterial species and environment (Andersson and Hughes, 2008) and is thus often unknown and  
47 likely to be multifaceted. One of the better studied examples is the cost of rifampicin resistance.  
48 Rifampicin targets the bacterial RNA polymerase (RNAP), and resistance to rifampicin is usually  
49 mediated by mutations in the  $\beta$  subunit of RNAP (Campbell et al., 2001). Several studies point to  
50 the rate of transcription, particularly as it pertains to the synthesis of ribosomal RNA and  
51 ribosomal proteins, as an important mediator of growth rate (Gourse et al., 1996; Thiele et al.,  
52 2009). A slowing down of transcription is therefore the prime mechanistic candidate for the cost  
53 of rifampicin resistance (Qi et al., 2014; Reynolds, 2000). The mechanism linking RNAP activity  
54 to ribosome biosynthesis provides a compelling explanation for the cost of rifampicin resistance  
55 in rapidly dividing bacteria such as *Escherichia coli* and *Pseudomonas aeruginosa* whose growth relies  
56 on the rapid replenishment of biosynthetic machinery lost through cell division (Ehrenberg et al.,  
57 2013). Importantly, the fitness cost of rifampicin resistance can be mitigated or even reversed  
58 through the acquisition of secondary, compensatory mutations in the  $\alpha$ ,  $\beta$  and  $\beta'$  subunits of  
59 RNAP that seem to restore normal enzyme function (Qi et al., 2014; Song et al., 2014; Stefan et  
60 al., 2018).

61 Rifampicin-resistant *Mtb* is one of the major causes of AMR-associated mortality globally,  
62 claiming an estimated 240,000 lives in 2016 (WHO, 2017), and unlike in fast-growing bacteria,  
63 the rate of transcription does not seem to reflect the fitness cost of key *rpoB* mutations, measured  
64 either as growth rate *in vitro* or prevalence in the clinic (Gagneux et al., 2006; Gygli et al., 2017;  
65 Stefan et al., 2018). While relative fitness does seem to determine the clinical success of  
66 rifampicin-resistant *Mtb* (Grandjean et al., 2015), and compensatory mutations are frequently  
67 found in settings with a high burden of drug resistant TB (Casali et al., 2014; Comas et al., 2012;

68 de Vos et al., 2013; Farhat et al., 2013), the basis for the fitness cost of rifampicin resistance  
69 remains unknown in *Mtb*. Understanding the mechanism by which *rpoB* mutations impair normal  
70 *Mtb* physiology could help identify new intervention points, through which we could stem the  
71 tide of existing and emergent rifampicin resistance.

72 We used the known ability of mutations in the beta barrel double  $\psi$  (BBDP) domain of the  $\beta'$   
73 subunit of RNAP to compensate for the fitness cost of resistance mutations occurring in the  $\beta$   
74 subunit in *Mtb* as a starting point (Molodtsov et al., 2017; Song et al., 2014; Stefan et al., 2018).  
75 Compensatory mutations improve patient to patient transmission of rifampicin-resistant strains  
76 (de Vos et al., 2013), and partially reverse biochemical changes imparted on RNAP by rifampicin-  
77 resistance mutations (Song et al., 2014; Stefan et al., 2018). We hypothesise that the same would  
78 be true for gene expression differences. Leveraging the knowledge of the role of RpoC  
79 mutations, we used transcriptomic and proteomic expression profiling to identify the signature of  
80 compensation and therefore infer the likely mediators of fitness cost in a collection of strains  
81 derived from a drug-susceptible clinical isolate (see Figure 1). Our findings point to the  
82 idiosyncratic consequences of expressional dysregulation as a key factor conferring a fitness cost  
83 to rifampicin resistance in *Mtb*. We expanded on this observation by profiling the expression  
84 signature of rifampicin resistance in a panel of genetically diverse clinical isolates sharing the same  
85 rifampicin resistance-conferring mutation: RpoB Ser450Leu. While we found very little evidence  
86 for a shared expression signature of rifampicin-resistance across the tested strain pairs, we show a  
87 correlation between the fitness cost of the rifampicin-resistance conferring mutation and the  
88 extent to which its presence imparts a deviation from the proteome composition of the wild-type.  
89 Finally, we show that this correlation could be exploited to suppress the emergence of rifampicin  
90 resistance.

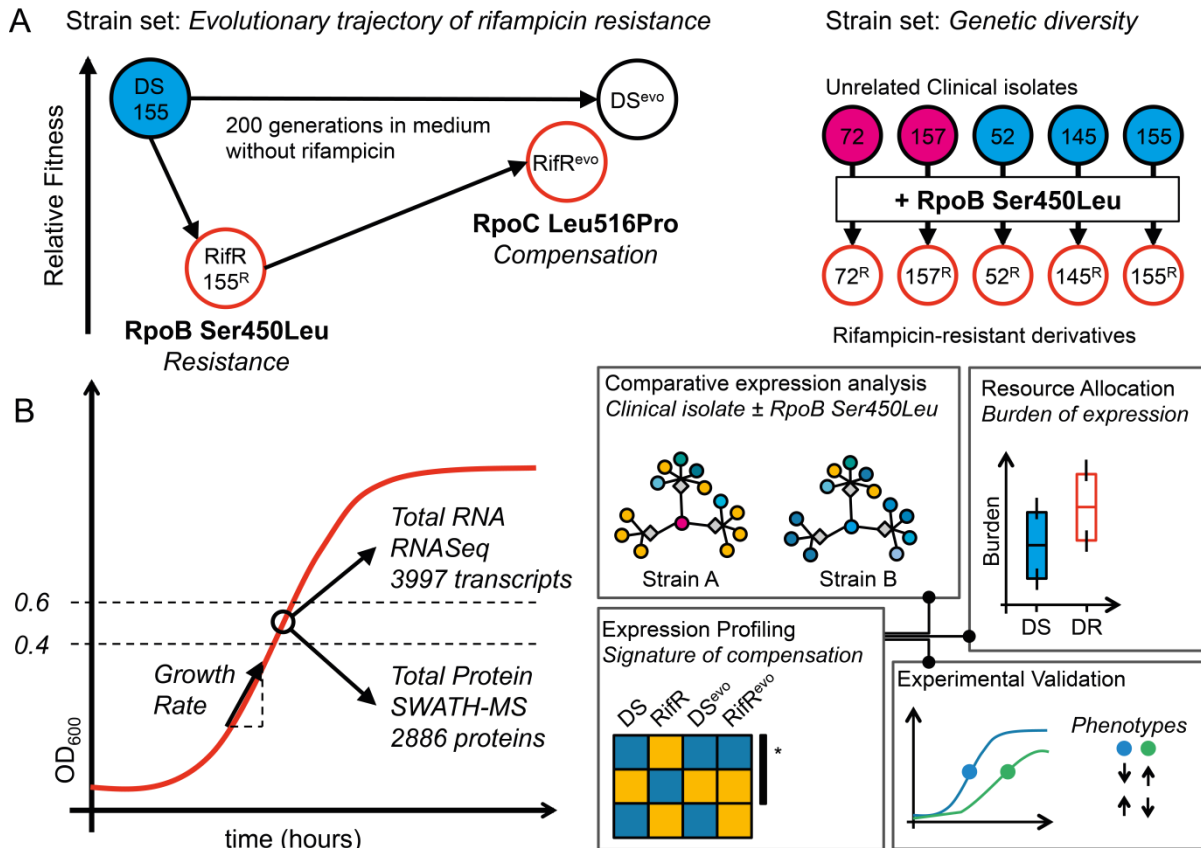

**Figure 1: Conceptual workflow.** **A.** Two complementary strain sets used for the experiments. Strains comprised in the “Evolutionary trajectory of rifampicin resistance” set were derived from a single clinical isolate (DS, N0155) by isolation of a Ser450Leu mutant in the lab and the subsequent passage for 200 generations in the absence of rifampicin. These strains were used to identify expression changes that are reversed by compensation - **signature of compensation**. The generalizability of our finding was checked using the “Genetic diversity strain set” containing five independent clinical isolates and their rifampicin-resistant derivatives. All rifampicin resistant strains shared the same resistance mutation – RpoB Ser450Leu. **B.** Experimental outline for the sampling and analyses.

## 91 Results

### 92 Compensatory mutations mitigate resistance-imposed expression changes

93 Physiological changes incurred by a fitness cost are likely to manifest as deviations in gene  
 94 expression. Since mutations in the BBDP domain of the  $\beta'$  subunit of RNAP mitigate the fitness  
 95 cost of rifampicin-resistance mutations in *Mtb* (Molodtsov et al., 2017; Song et al., 2014; Stefan et  
 96 al., 2018) they should also impact and therefore highlight expression changes that are relevant to  
 97 the understanding of fitness cost of rifampicin resistance.

98 We previously reported the result of a directed evolution experiment in which we identified a  
 99 mutation in the BBDP domain: RpoC Leu516Pro as a putative compensatory mechanism for the  
 100 fitness cost of the rifampicin-resistance conferring mutation RpoB Ser450Leu in a clinical  
 101 isolate (Comas et al., 2012). The strains generated by that study comprise the original drug-

102 susceptible isolate (DS), its laboratory-derived rifampicin-resistant mutant (RpoB Ser450Leu,  
103 Rif<sup>R</sup>) and the resulting evolved strains obtained by serial passage in the absence of rifampicin for  
104 200 generations (DS<sup>evo</sup> and Rif<sup>R</sup><sup>evo</sup>, respectively, see Figure 1A). Together these strains offer a  
105 representative snapshot of the evolutionary process that passes through the initial emergence of  
106 (costly) drug resistance and leads to the establishment of a mature drug-resistant strain whose  
107 fitness is indistinguishable from its drug susceptible ancestor. We therefore hypothesised that  
108 comparative transcriptomic and proteomic expression profiling of these strains will allow us to  
109 determine the signature of the fitness cost associated with rifampicin resistance.

110 First, we determined the relative fitness of Rif<sup>R</sup>. Using a mixed effect linear regression model to  
111 analyse growth assays, we noted a 26.4% decrease (CI<sup>95%</sup>: 21.5 – 31.0%,  $p < 0.001$ ) in the growth  
112 rate of Rif<sup>R</sup> when compared to DS. The comparison of their evolved counterparts – DS<sup>evo</sup> and  
113 Rif<sup>R</sup><sup>evo</sup> – showed no significant differences (-1.2%, CI<sup>95%</sup>: -10.8 – 7.1%,  $p = 0.814$ ), illustrating the  
114 fact that RpoC Leu516Pro does indeed compensate the fitness cost of rifampicin resistance.

115 We aimed to identify differences in the baseline, unperturbed, gene expression as a proxy for  
116 describing the biological basis for reduced fitness in Rif<sup>R</sup>. We sampled actively growing bacterial  
117 cultures of each of the four strains, extracting total RNA and protein to be profiled using RNA  
118 sequencing (RNAseq) and sequential window acquisition of all theoretical mass spectra  
119 (SWATH-MS), respectively (see Figure 1B). In total, we were able to obtain RNA transcript  
120 counts for all present regions of the *Mtb* genome and reliably quantify 2,886 proteins across our  
121 samples (Figure S1). We used differential expression analysis to test our hypothesis that the  
122 compensatory mutation RpoC Leu516Pro had the net effect of reversing, at least partially, the  
123 expression changes brought about by the rifampicin resistance mutation RpoB Ser450Leu. We  
124 named this trend a “signature of compensation” – see Figure 2A and we derived it by identifying  
125 genes that are uniquely differentially expressed in Rif<sup>R</sup> compared to the other three strains in our  
126 dataset. To maximise the probability of identifying the signature of compensation, we chose an  
127 inclusive definition of differential expression: a p-value of less than 0.05 after adjusting for  
128 multiple testing (see Methods). In keeping with our inclusive approach, we also deliberately did  
129 not use an effect size threshold (e.g. minimum log-fold change).

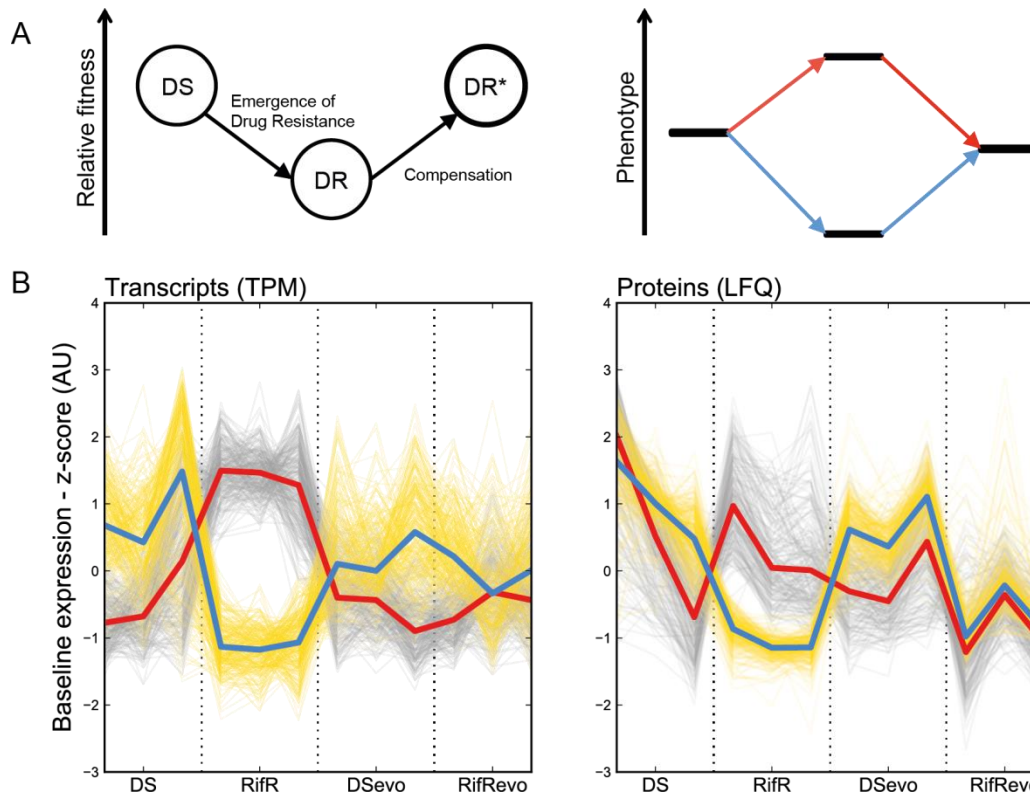

**Figure 2: Signature of compensation.** **A.** The relative fitness of drug resistant strains (DR) is expected to be lower than wild type (DS) at first, but then is expected to increase due to compensatory evolution. The phenotypic equivalent of this trend is illustrated as an increase/decrease in a measurable trait upon the emergence of resistance that is then returned to its previous level through compensation. We refer to this dynamic as the “Signature of Compensation”. **B.** Plot of transcript counts per million bases (TPM) and label free quantifications (LFQ) of cellular proteins for genes whose expression is perturbed by the Ser450Leu mutation in RpoB and returned to wild type in the presence of the compensating Leu516Pro mutation. All results were standardized across measurements for a single gene to allow the comparison between strains. Grey traces show genes that are significantly more highly expressed in RifR, yellow traces show genes that were significantly less highly expressed in RifR. The red and blue bold lines show the median of the sample for more and less highly expressed proteins, respectively. Data of three independent biological replicates for each strain are shown.

130

131 Using these criteria, we identified 536 transcripts that could be involved in the cost of resistance.  
132 289 transcripts were less abundant and 247 were more abundant in RifR compared to the other  
133 samples. Similarly, 536 proteins showed a significant signature of compensation: 260 proteins  
134 were more and 276 were less-abundant in RifR (see Figure 2B). Gene set enrichment analysis of  
135 the transcriptomic and proteomic data pointed to iron homeostasis being significantly affected.  
136 Specifically, it indicated a higher expression, in RifR, of genes that are repressed by the iron-  
137 dependent regulator (IdeR, Rv2711) in iron replete conditions. Among them, there was a  
138 significant enrichment of genes involved in polyketide and non-ribosomal peptide synthesis,  
139 which include the biosynthetic machinery for the sole *Mtb* siderophore: mycobactin (see Figure  
140 S2-4). These changes suggested that RifR faced a shortage of iron in our experimental conditions.

141 The availability of iron is an essential requirement for *Mtb* growth, both in culture and during  
142 infection, and iron acquisition systems are therefore key virulence factors (Jones et al., 2014;  
143 Reddy et al., 2013; Wells et al., 2013). Hence, an increased requirement for iron could manifest  
144 itself as a loss of relative fitness. The fact that RpoB Ser450Leu led to a modification of the  
145 expression of genes involved in iron homeostasis and that RpoC Leu516Pro reversed the effect  
146 provides a compelling alternative mechanism underpinning the apparent fitness cost of  
147 rifampicin resistance. If the disruption of iron homeostasis drives fitness cost, we would expect  
148 that iron supplementation should mitigate the relative cost of RpoB Ser450Leu. Furthermore,  
149 based on the expression profile, we expected that RifR should produce more mycobactin at  
150 baseline than DS, potentially influencing the overall growth rate of the mutant.

151 We addressed the first hypothesis by comparing growth rates of RifR and DS in the presence or  
152 absence of 10  $\mu$ M hemin – an additional source of iron that is by itself sufficient to support the  
153 growth of a mutant defective in mycobactin biosynthesis. Importantly, hemin and mycobactin  
154 provide two separate routes of iron uptake, which allows us to side-step issues that might emerge  
155 from deficient iron transport (Jones et al., 2014). The presence of hemin did not change the cost  
156 of RifR, which we calculated to be 18.6% in the absence and 20.9% in the presence of hemin for  
157 this experiment (Mixed effect linear model,  $p = 0.737$ ). Similarly, hemin did not impact the  
158 growth rate of DS (- 4.7%,  $CI^{95\%}$ : -16.3 – 2.3%,  $p = 0.128$ ). In summary, iron did not appear to  
159 limit the growth of RifR under normal conditions.



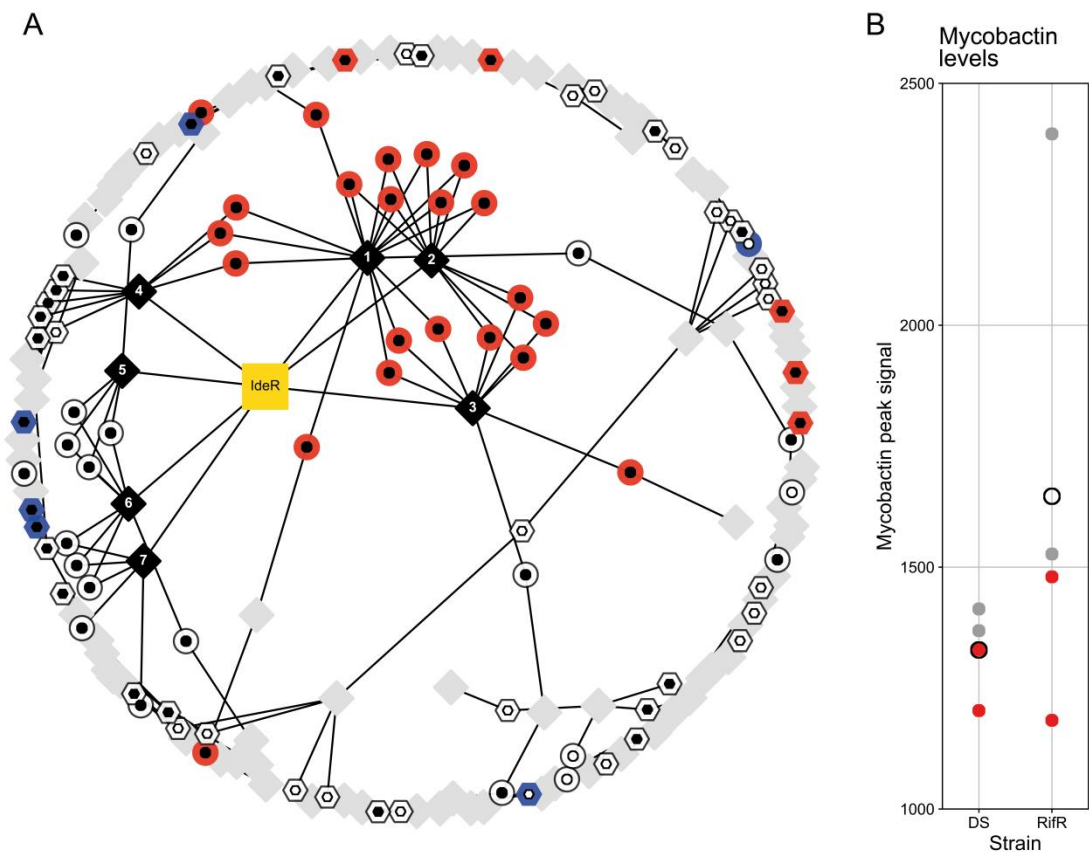

**Figure 3: RifR has a higher baseline level of mycobactin biosynthesis than DS.** **A.** Subset of the gene regulatory network (Peterson et al., 2014) containing iron responsive genes. Circles represent IdeR-regulated genes that are either induced (black inner circle) or repressed (white inner circle) in low iron conditions. Hexagons represent IdeR-independent iron responsive genes that are induced (white inner hexagons) or repressed (black inner hexagons) in low iron conditions. We used blue and red to indicate significantly lower or higher RNA expression in RifR, respectively – (n=12, see Methods for further details). Diamonds represent transcriptional modules as defined by Petersen et al, black diamonds indicate modules that contain at least 3 IdeR-responsive genes. Edges connect gene nodes with the module nodes they belong to. Labels 1-7 refer to Module 502 (1), Module 525 (2), Module 267 (3), Module 446 (4), Module 231 (5), Module 086 (6) and Module 295 (7) from the original publication. **B.** Relative mycobactin levels expressed as maximum peak heights for DS and RifR in normal medium (grey dots) and iron-supplemented medium (10 $\mu$ M hemin, red dots). Each filled circle represents the quantification of an independent biological replicate. Unfilled circles represent the mean of the observations.

160

161 Next, we addressed the production of mycobactin. We prepared whole cell extracts from DS and  
162 RifR grown in both, normal medium and medium supplemented with 10  $\mu$ M hemin. We found  
163 that on average RifR produced more mycobactin than DS, corroborating the physiological  
164 relevance of the increased baseline expression of mycobactin biosynthesis genes. We also  
165 observed a slight decrease in the production of mycobactin in bacteria grown in the hemin-  
166 supplemented medium, pointing to a modification of the expression of mycobactin biosynthesis  
167 cluster in response to iron (See Figure 3). Given that the growth rate was not affected by the  
168 presence of hemin, these findings suggest that mycobactin itself does not modulate the growth

169 rate of the mutant. It is therefore possible that the higher expression of the biosynthetic cluster  
170 itself might impart a fitness cost.

171 Interestingly, while significantly enriched, only half of the genes reported to be repressed by IdeR  
172 (Rodriguez et al., 2002) in iron-replete conditions were part of the signature of compensation (22  
173 out of 40 genes). This prompted us to take a closer look at the IdeR regulon and its regulation.  
174 We took advantage of recent studies modelling the global gene regulation in *Mtb* (Minch et al.,  
175 2015; Peterson et al., 2014; Rustad et al., 2014). We reconstructed the genome-wide gene  
176 regulatory network and extracted the immediate neighbours of IdeR- and iron-responsive  
177 genes (Peterson et al., 2014). There were 7 expression modules that contained at least 3 genes that  
178 are part of the IdeR regulon (Figure 3, black diamonds). Together, these modules covered 82.5%  
179 of all the IdeR-repressed genes, and with the exception of Module 4 (Figure 3), none of the  
180 modules included IdeR-independent iron-responsive genes. All the genes that we identified as  
181 candidates for compensation belonged to Modules 1-4, while none of the genes included in the  
182 other modules were found to be differentially expressed in RifR. A key difference among  
183 modules was that IdeR-regulated genes represented more than half of all the genes in modules  
184 affected by compensation but fewer than half in those that were not part of the “signature of  
185 compensation”. Mapping proteomic data onto the same expression network produced similar  
186 results (see Figure S5). Interestingly, few of the IdeR-independent iron-responsive genes were  
187 part of the signature of compensation. This pattern implies a modulation of the canonical  
188 function of IdeR, either through regulatory inputs from other transcription factors, or some  
189 other mechanism.

190 These results supported our hypothesis that mutations in *rpoB* impart changes to the baseline  
191 expression profile of *Mtb* that could be reversed in the presence of a compensatory mutation in  
192 *rpoC*. Combining the expression data with our findings that iron supplementation and mycobactin  
193 levels did not affect RifR growth rates, we concluded that the transcriptional changes were not  
194 driven by the demand for iron. Instead, these changes might be a reflection of a dysfunction of  
195 RNAP – e.g. differences in promoter specificity or modified interaction with IdeR, whose  
196 downstream consequences may impose a fitness effect. For example, as the mycobactin  
197 biosynthesis cluster comprises several large proteins, their excessive production could represent a  
198 drain on the cell’s resources. If true, we would expect such effects to be universal across all *Mtb*  
199 strains carrying this *rpoB* mutation.

## 200 **The impact of RpoB Ser450Leu is shaped by epistasis**

201 We wanted to test the hypothesis that higher expression of the mycobactin biosynthetic cluster is  
202 a general feature of rifampicin resistance in *Mtb* and therefore the underlying cause of its fitness

203 cost. To do so, we generated RpoB Ser450Leu mutants in five genetically diverse clinical isolates  
204 belonging to two different *Mtb* lineages and profiled them. Globally, *Mtb* can be grouped into  
205 seven distinct genetic lineages each with a specific geographic distribution (Gagneux, 2018). *Mtb*  
206 lineages can differ in their interaction with the human host, the dynamics of disease progression,  
207 and also in their apparent propensity to acquire drug resistance (Coscolla and Gagneux, 2014;  
208 Ford et al., 2013). We chose strains belonging to Lineage 1 and 2, because of their large  
209 phylogenetic separation (see Figure S6) and more importantly, because drug resistance is often  
210 associated with Lineage 2 and relatively rare in Lineage 1 (Borrell and Gagneux, 2009). We  
211 expected that the comparison of the transcriptome and proteome between the Ser450Leu  
212 mutants and their cognate wild type ancestor would allow us to identify general patterns of  
213 fitness cost linked to this mutation.

214 It is important to note that this comparison did not include any compensated strains, i.e. strains  
215 carrying mutations in the BBDP domain. We were therefore unable to focus our analysis  
216 exclusively on genes whose expression was corrected by the presence of an *rpoC* mutation.  
217 Nonetheless, direct comparison of RifR and DS is virtually indistinguishable from the signature  
218 of compensation when considering IdeR-regulated genes and therefore serves as a reasonable  
219 proxy for our analyses (see Figure S5).

220 We started by measuring the growth characteristics of the wild type isolates and the relative cost  
221 of the RpoB Ser450Leu mutation in the different strain backgrounds. The generation time varied  
222 from 22.7 h (<sup>95%</sup>CI: 20.8 – 25.0 h) to 31.0 h (<sup>95%</sup>CI: 29.3 – 35.1 h). The relative fitness cost of the  
223 RpoB Ser450Leu mutation differed as well, from a modest 2 % (mixed effect linear regression,  $p$   
224 = 0.71) to a pronounced 27 % (mixed effect linear regression,  $p = 5.6 \times 10^{-6}$ ).

225 We obtained the expression profiles for each strain to check whether the pattern we identified for  
226 IdeR-repressed genes was a universal phenotype for RpoB Ser450Leu mutants. Analysing the  
227 transcriptomic data by performing a single comparison across the five strain pairs, we found that  
228 only 17.5% (7/40 genes) of the IdeR-repressed genes were significantly differentially expressed. A  
229 single gene belonging to the mycobactin biosynthesis cluster was included in that number.  
230 Proteomic analysis revealed a similar result – 17.1% (6/35 detected proteins) were found to be  
231 significantly differentially expressed across all strains, none of which belonged to the mycobactin  
232 biosynthesis cluster. None of the iron-homeostasis gene sets highlighted in the “signature of  
233 compensation” were significantly differentially expressed across all strains. Since these findings  
234 were contrary to our expectations, we stratified the analysis and mapped the differential  
235 expression results for each strain onto the IdeR- and iron-responsive gene network we collated  
236 earlier. These results echoed our combined analysis: the signature of compensation was not

237 universal across the tested strains. N0155, which corresponds to “DS”, is the only strain to show  
 238 a transcriptional profile consistent with the signature of compensation (see Figure 4A). Proteomic  
 239 data corroborated this finding (see Figure S7). It is important to note that these data represent an  
 240 independent replication of the experiments, from which we derived the signature of  
 241 compensation, showing that our original results are robust and reproducible. However, the  
 242 absence of a coherent IdeR-responsive phenotype was clear evidence of epistasis and raised a  
 243 broader question: are there any commonalities in the phenotypic manifestation of the RpoB  
 244 Ser450Leu mutation among our set of strains?

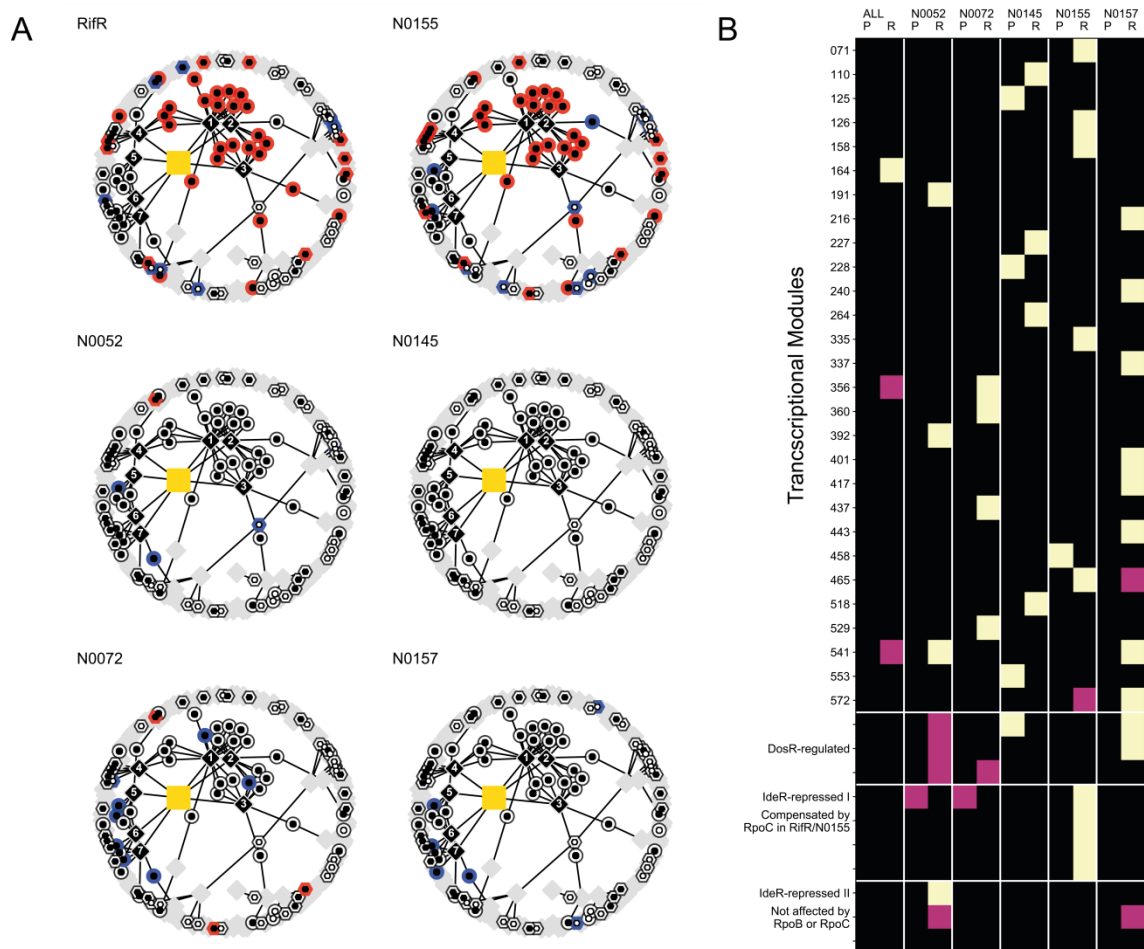

**Figure 4: The prominent role of mycobactin biosynthesis in the signature of compensation is not universal.** **A.** Iron-responsive subset the of gene regulatory network, as shown in Figure 3, coloured based on transcriptional differential expression data from pairwise comparison of genetically distinct rifampicin-susceptible clinical isolates and their cognate RpoB Ser450Leu mutants. RifR and N0155 refer to an independent sampling of the same strain pairs. See Figure S7 for the proteome counterpart of this plot. For RifR, N0072 and N0157 the plot is based on the comparison of three drug susceptible and three rifampicin resistant samples. For N0155, N0145 and N0052 we used two samples of each. **B.** Representation of the enrichment of significantly differentially expressed genes within individual transcriptional modules, as defined elsewhere (Peterson et al., 2014). The columns alternate proteomic (P) and transcriptomic data (R). “ALL” refers to the global differential expression analysis of all rifampicin-susceptible against all rifampicin-resistant strains. The remaining column annotations refer to individual pair-wise comparisons in different genetic backgrounds. Black squares represent no significant enrichment, mauve squares and yellow squares show enrichment at  $0.01 < p < 0.05$  and  $p < 0.01$  using a Fisher’s exact test. These p-values are not adjusted for multiple

testing. Modules covering the DosR-regulon and IdeR-iron repressed regulon are highlighted separately.

245

246 To address this question we sought to identify expression modules (Peterson et al., 2014) whose  
247 membership was well represented among significantly differentially expressed genes in at least  
248 one pair-wise comparison between a rifampicin-resistant strain and its cognate drug-susceptible  
249 ancestor (see Methods for details). Using transcriptomic and proteomic data, we identified 33  
250 expression modules that fitted our criterion (see Figure 4B). There was virtually no consensus  
251 across the strains in the transcriptional or translational response to the *rpoB* mutation. The only  
252 case where we observed partial agreement across genetic backgrounds concerned some of the  
253 modules controlled by the hypoxia-responsive regulator DosR (Park et al., 2003). As with  
254 modules containing IdeR iron-repressed genes, we observed only partial regulon induction for  
255 DosR. Specific modules were clearly involved in the expression changes (either protein or  
256 transcript) in each background, but the impact of these was strain-specific. A complementary  
257 manifestation of this phenomenon comes from the global comparison of all rifampicin-resistant  
258 strains against all wild type strains, which highlighted a single module as enriched for significantly  
259 differentially expressed genes. Comparing the distribution of the effect sizes, as measured by the  
260 per-gene fold-changes in expression in the combined analysis and the pairwise comparisons for  
261 each strain, we saw a marked muting of the magnitude of differential expression in the former  
262 (see Figure S8). This was likely due to the averaging effect of the combined analysis suppressing  
263 the contribution of the differential expression from individual strains. The magnitude of the  
264 expression change in pairwise comparisons was comparable across strains.

265 Overall, we were able to identify a wealth of gene expression changes in our samples: as many as  
266 958 transcripts and 1914 proteins were observed to be differentially expressed in at least one  
267 comparison across our samples. On the level of individual genes, the transcriptome and to lesser  
268 extent the proteome of each strain were perturbed in their own private way (see Supplementary  
269 Figures 9&10), manifesting itself as the drug resistance iteration of the Anna Karenina principle  
270 (Zaneveld et al., 2017). Because the majority of those changes were specific to individual strains  
271 they were largely invisible if the comparison was made across all strain pairs. The fact that the  
272 same mutation can have such profoundly different outcomes depending on the genetic context in  
273 which it occurs, is clear evidence of epistasis, and shows that natural genetic variation can  
274 fundamentally impact the physiological consequences and therefore evolution of drug resistance.  
275 Importantly, the impact of resistance on the expression profile of any two strains was found to  
276 be independent of the genetic distance between them (see Figure S11).

277 So far, we showed that the RpoB Ser450Leu causes a considerable re-organization of baseline  
278 gene expression, that this perturbation can be reversed by a compensatory mutation in RpoC and  
279 that the specific phenotypic manifestation was dependent on mutations that occurred more  
280 recently than those defining individual lineages. These findings were consistent with our  
281 observation that the same mutation imposed a different fitness cost to different strains. We  
282 therefore sought to find correlates of the varying fitness costs.

### 283 Deviation from baseline expression correlates with the cost of rifampicin resistance

284 Pleiotropic phenotypes of the kind described above are not normally addressed, however we  
285 wanted to explore whether the extent of the expression perturbations correlated with the varying  
286 fitness costs of Ser450Leu we observed in different genetic backgrounds. We reasoned that the  
287 cumulative impact on expression disruption, rather than the dysregulation of individual genes,  
288 would provide a conduit for a loss of fitness.

289 In the first instance, we considered the correlation between the fitness cost of the *rpoB* mutation  
290 and the overall expression distance between the mutant and its cognate wild type strain (See  
291 Figure S12). Through this approach, we were able to detect a relationship between cost and  
292 expression differences for the expressed proteins ( $R^2 = 0.83$ ,  $p = 0.031$ , ordinary least squares  
293 linear regression) but not RNA ( $R^2 = 0.39$ ,  $p = 0.258$ , ordinary least squares linear regression).  
294 Given that the correlation was stronger in the proteome compartment, and that the proteome  
295 compartment seemed more affected by resistance, we elaborated on our observation by  
296 incorporating a measure of physiological cost for each protein. We used two different metrics for  
297 cost. In the simpler case we used the molecular weight of amino acids as proxy for the resource  
298 investment necessary to generate each protein (Seligmann, 2003). We also used estimates of ATP  
299 cost for each amino acid in *E. coli* as a way to approximate the level of energy investment a  
300 bacterial cell makes when synthesising its proteome (Akashi and Gojobori, 2002). Both metrics  
301 showed that drug resistance imposes an additional physiological cost to the baseline proteome  
302 (Molecular Weight: Mann-Whitney U-test,  $p = 8.26 \times 10^{-4}$ , ATP equivalents: Mann-Whitney U-  
303 test,  $p = 4.50 \times 10^{-4}$ , see Figure S13). Furthermore, this cost was negatively correlated with the  
304 relative fitness of the RpoB Ser450Leu mutation in a given strain background ( $\rho_s = -0.90$ ,  $p =$   
305  $0.04$ ) – the greater the deviation from the resource investment of the ancestral proteome, the  
306 larger the cost of the mutation (see Figure 5A). Growth rate and gene expression are not  
307 independent from each other. To test the possibility that the observed correlation may be an  
308 artefact of our analysis, we took advantage of the natural variation in growth rates of different  
309 drug-susceptible clinical isolates in our medium and compared them to the relative costs of  
310 expression (See Figure S14). We performed a pairwise comparison across all the tested strains

311 and observed no statistically significant correlation between the differences in the investment into  
 312 the proteome and the difference in growth rates ( $\rho_s = 0.34$ ,  $p = 0.33$ ). The differences in the  
 313 allocation of resources into the protein compartment of different bacterial strains were therefore  
 314 not the main determinant of variation in their respective generation times.

315 Taken together, our results seemed to suggest that the ultimate manifestation of the disruption of  
 316 wild type baseline gene expression by RpoB Ser450Leu was a net increase in the biosynthetic  
 317 input required to maintain the steady state proteome: the greater the cost of the disruption, the  
 318 greater the slowing down of growth in a given strain background. We propose this as the  
 319 “Burden of Expression” hypothesis of the fitness cost of rifampicin resistance.

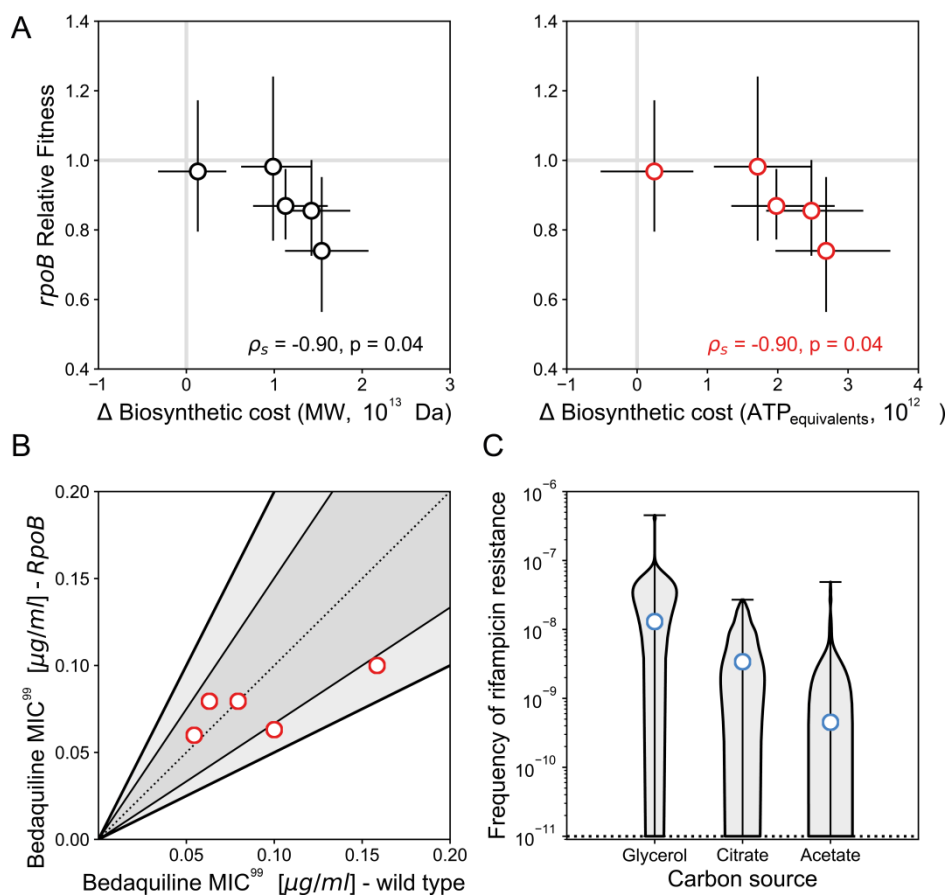

**Figure 5: The fitness cost of RpoB Ser450Leu correlates with increased resource requirements.** **A.** The relative fitness of Ser450Leu RpoB mutants estimated from growth rate data is negatively correlated with the magnitude of the deviation from the resources allocated to the wild type proteome.  $\rho_s$  – Spearman correlation. Error bars indicate the 95% confidence interval for the data. Each cost determination was obtained from a minimum of four independent cultures per strain. Protein costs were derived from a total of 24 proteomic samples. **B.** Comparison of minimum inhibitory concentrations (MIC) of bedaquiline in clinical isolates and their cognate RpoB mutants. Dotted line shows parity, darker shading includes 50% or lower difference in MIC and the lighter shading spans up to 2-fold change in MIC. Each dot represents the mean of three independent measurements. **C.** The frequency of rifampicin resistance as measured in the model organism *Mycobacterium smegmatis* with the Luria-Delbrück fluctuation assay in media containing different carbon sources. The blue dot corresponds to the Ma-Sandri-Sarkar maximum likelihood estimate for the frequency of rifampicin resistance. The shaded area shows the density distribution of the number of resistant colonies per scored culture. The dotted line indicates the limit of detection. Each estimate is based on 120 independent cultures for glycerol and citrate and 150 independent cultures for

acetate.

320

### 321 Carbon allocation rather than ATP availability modulates cost of resistance

322 An implication of the “Burden of expression” hypothesis is the possibility of suppressing the  
323 emergence of rifampicin-resistance in mycobacteria by maximising the additional biosynthetic  
324 cost imposed by the deviation from the baseline expression. We tested two types of conditions  
325 that may impose such a stress: inhibition of ATP synthesis and variation of carbon-source quality.  
326 The first would disrupt the ability to generate energy through catabolic processes, while the  
327 second would place more emphasis on the anabolic aspects of bacterial growth. In the first  
328 instance, we tested the susceptibility to bedaquiline, an ATP synthase inhibitor that leads to a  
329 decrease in intracellular ATP levels in *Mtb* (Andries et al., 2005). Given the higher baseline cost of  
330 their proteome, we expected that RpoB Ser450Leu mutants should show an increased  
331 susceptibility to bedaquiline commensurate with their relative loss of fitness. We did not observe  
332 any correlation between bedaquiline susceptibility and the cost of the RpoB Ser450Leu mutation  
333 (see Figure 5B).

334 Next, we explored varying carbon source quality, expecting substrates that force the bacterial cell  
335 to rely more heavily on anabolic processes to serve as amplifiers for the perceived cost of  
336 rifampicin resistance. A related phenotype has been reported before for RpoB Ser450Leu (Song et  
337 al., 2014). We chose the Luria-Delbrück fluctuation assay as an unbiased readout for the overall  
338 increase in the cost of rifampicin-resistance, because its frequency of resistance estimate contains  
339 a signal for the ability of drug resistant bacteria to propagate within the population prior to  
340 antibiotic exposure (Ycart, 2013). The global increase in the cost of RpoB mutations would  
341 therefore manifest itself as an apparent decrease in the frequency of resistance, as the population  
342 size of pre-existing RpoB mutants would be smaller due to limited expansion post-emergence.  
343 We chose glycerol, citrate and acetate to test our hypothesis in the soil organism *Mycobacterium*  
344 *smegmatis*, whose patterns of rifampicin resistance mirror those of *Mtb* (Borrell et al., 2013). As  
345 expected, these three carbon sources supported different growth rates with measured generation  
346 times of the wild type being 3.24 h (<sup>95%</sup>CI: 3.23 – 3.25 h), 6.17 h (<sup>95%</sup>CI: 6.09 – 6.25 h) and 17.62  
347 h (<sup>95%</sup>CI: 17.61 – 17.62 h), respectively. We then determined the frequency of rifampicin  
348 resistance for bacteria grown on each carbon source using the Luria-Delbrück fluctuation assay.  
349 We found a striking correlation between carbon source and the calculated frequency of  
350 resistance, with bacteria grown in glycerol giving rise to rifampicin-resistant bacteria at a rate of  
351  $1.3 \times 10^{-8}$  (<sup>95%</sup>CI:  $1.2 \times 10^{-8}$  –  $1.5 \times 10^{-8}$ ), those grown in citrate at a rate of  $3.4 \times 10^{-9}$  (<sup>95%</sup>CI:  $2.9$   
352  $\times 10^{-9}$  –  $4.0 \times 10^{-9}$ ) and acetate-cultured bacteria at a rate of  $4.5 \times 10^{-10}$  (<sup>95%</sup>CI:  $3.4 \times 10^{-10}$  –  $5.6$



353  $\times 10^{-10}$ ) – see Figure 5C. This trend was remarkable, because it showed that changing only the  
354 carbon source, keeping all other variables constant, could lead to a 28-fold change in the  
355 frequency of resistance.

356 The disparity in outcomes between the two experimental approaches suggests that the availability  
357 of catabolic energy does not disproportionately influence the ability of RpoB mutants to survive.  
358 However, the impact of carbon source on the frequency of rifampicin-resistant bacteria within a  
359 population clearly suggests that carbon allocation might be an important driver of the fitness cost  
360 of rifampicin resistance.

## 361 Discussion

362 We normally expect that form follows function in bacteria: expression differences should reflect  
363 variations in physiological states. Indeed, we show that RpoB Ser450Leu imparted a measurable  
364 physiological perturbation in addition to conferring rifampicin resistance. Consistent with the  
365 suggested role of compensatory mutation (Comas et al., 2012), we confirmed that in one strain,  
366 RpoC Leu516Pro reduced both, the apparent fitness cost of rifampicin resistance and the  
367 magnitude of the expression changes arising from it. However, we also showed that the nature of  
368 the perturbation was not consistent across different genetic backgrounds. Instead, we observed a  
369 strain-specific response to the RpoB mutation, both in terms of the relative impact on growth  
370 and the rearrangement of gene expression. We further observed that the magnitude of the fitness  
371 cost that RpoB Ser450Leu imposes on a strain was related to the overall increase in the resources  
372 allocated to the proteome. Based on these observations, we proposed the “Burden of expression”  
373 hypothesis, with which we posited that in *Mtb*, the cost of rifampicin resistance was mediated by  
374 the metabolic burden imposed by the modified baseline protein expression of resistant strains.  
375 Elaborating on this hypothesis we demonstrated that interfering with anabolic processes could  
376 suppress the emergence of rifampicin resistance in the related organism *M. smegmatis*.

377 The “Burden of expression” hypothesis stems from experimental data with clear caveats. First,  
378 we started our analyses assuming that ribosomal biosynthesis is unlikely to play a key role in the  
379 cost of rifampicin resistance in *Mtb* and that therefore expression data were a better window into  
380 the modified physiology. Our data seem to support the validity of this assumption: ribosomal  
381 proteins represented only 5.5%, on average, of the total protein biomass in our experiments. This  
382 proportion was marginally higher in RpoB mutants, and it seemed to increase with increasing  
383 generation time (see Figure S15). These trends were more consistent with a cost imposed by the  
384 metabolic burden of making ribosomes. Second, some of our key conclusions are based on a  
385 relatively small number of strains. Nonetheless, to the best of our knowledge, this sample set

386 represents the most comprehensive and best curated account of rifampicin resistance-induced  
387 global expression changes in *Mtb* to date, covering both: evolutionary dynamics and phylogenetic  
388 diversity. We were also able to show that patterns of expression detected in the DS-RifR  
389 comparison were robust when the same strain pair was sampled again (see Figure 4 and Figure  
390 S7). Importantly, key inferences that led us to propose the hypothesis came from SWATH-MS  
391 proteomic data drawn from the five different strain backgrounds. These data showed a clear  
392 clustering of biological replicates (see Figure S16), with the exception of N0145 for which we  
393 were also unable to detect a significant cost for the Ser450Leu mutation or any significant  
394 changes to the expression. Third, we assumed that label free quantification (LFQ) using the “best  
395 flyer peptide” or TopN approach, which reflects the proportional abundance of individual  
396 proteins within our samples (Schubert et al., 2015), can be used to draw conclusions about the  
397 resource investment of the cell and can be extended to the growth rate of bacteria. It is possible  
398 that the roles are reversed and the growth rate of bacteria in fact determines the protein  
399 complement being expressed (Beste et al., 2007). We addressed this possibility by performing a  
400 comparison of proteome investment and growth rate for wild type strains only. If the growth rate  
401 of *Mtb* did indeed determine the protein complement of cells across genetic distances on an  
402 evolutionary timescale, we would expect a strong correlation between differences in proteome  
403 and differences in growth rates between any two strains. This was however not the case (see  
404 Figure S13). Finally, we also assumed that the proteome plays a central role in imposing a limit to  
405 the growth rate of an *Mtb* cell. There are other components that require considerable investment  
406 in carbon: in the case of *Mtb* both lipids and cell wall may act as a sink for resources limiting  
407 growth as they can account for over half of the dry mass of actively growing cells (Beste et al.,  
408 2005). Lipidomic analysis of RpoB mutants in *Mtb* pointed to differences in mycobactin  
409 biosynthesis as one of the biggest discrepancies between rifampicin-resistant mutants and their  
410 susceptible ancestors (Lahiri et al., 2016). While echoing a key observation from our quest for  
411 determining the cost of resistance, we saw no evidence that mycobactin biosynthesis itself  
412 changes the rate of bacterial growth. The virulence-associated phthiocerol dimycocerosates  
413 (PDIM) have also been implicated in the cost of rifampicin resistance (Bisson et al., 2012), as  
414 have other changes in lipid composition (du Preez and Loots du, 2012). The full exploration of  
415 the role of lipids in the physiology of rifampicin-resistant *Mtb* is beyond the scope of this study,  
416 but it would provide an interesting new and complementary avenue to pursue.

417 Keeping these considerations in mind, there are two striking features to emerge from our results.  
418 The first is the pervasive epistasis modulating the impact of RpoB Ser450Leu: the same mutation  
419 has markedly different effects on the physiology of different *Mtb* strains. The second is the  
420 apparent mechanism through which modulation of gene expression is propagated across the

421 levels of bacterial physiology. Modification in RNAP function seems to have pleiotropic effects  
422 that transcend the disruption of any single group of genes, and impart a perturbation that appears  
423 to affect bacterial resource allocation.

424 One question that remains open is what sits at the heart of the disparity in phenotypes? The  
425 sequence of RNAP is effectively the same in all strains (Borrell and Trauner, 2017); and by  
426 extension so are the biochemical changes that arise from resistance (Stefan et al., 2018). We  
427 envisage that part of the answer lays in differences in underlying robustness: a strain's capacity to  
428 buffer perturbation. Furthermore, we can consider this a window into the evolutionary  
429 adaptation of each strain and a sign of how different their physiologies really are. The  
430 amalgamation of mutational differences that effectively makes up a strain genetic background  
431 weaves a baseline phenotype that allows different *Mtb* strains to be successful pathogens despite  
432 differences in their underlying physiology: i.e. there are several successful approaches to solving  
433 the same problem. These differences are unmasked by the presence of a mutation that sits at the  
434 core of gene expression and reveals idiosyncratic transcriptional responses to rifampicin  
435 resistance that are poorly conserved across genetic distances. This observation has the implication  
436 that, beyond the described mutations in BBDP, which seem to alleviate some of the biochemical  
437 and gene expression effects of rifampicin resistance more generally, further investigation of  
438 positive selection of compensation of resistance-related traits should be performed in genetically  
439 related strains as they could vary considerably when comparing phylogenetically distant strains  
440 (Farhat et al., 2013; Zhang et al., 2013).

441 The strain-specific nature of resistance-related expression perturbations can be used to provide a  
442 credible link to disparate growth rate modulation. Our suggestion that proteome composition  
443 influences growth rate is not without precedent. This connection has been made before (Scott et  
444 al., 2010), and resulted in the formulation of a collection of “growth laws” that linked growth  
445 rates to the partitioning of the limited proteome between ribosomes and other proteins carrying  
446 out the rest of the cellular functions. Growth on different carbon sources impacted this balance,  
447 with “poorer” ones requiring a greater investment into the functional proteome, presumably  
448 because of the need for anabolic reactions increased the reliance on biosynthetic enzymes. A  
449 similar relationship has been observed in a wide range of microbial species (Karpinets et al.,  
450 2006). An elaboration of these growth relationships also led to the conclusion that the efficiency  
451 of proteome allocation can impact growth rates and cell physiology (Basan et al., 2015). Our  
452 finding that the increase in the relative cost of the proteome brought about by the gain of a  
453 mutation correlates with the relative fitness of that mutation is consistent with these reports, as is

454 our observation that anabolic processes may play a mechanistic role in setting the cost of a  
455 mutation.

456 The observed differential cost of rifampicin resistance across *Mtb* strains, provides a lens through  
457 which we can better understand the emergence of drug resistance in clinical TB. However, it also  
458 indicates a new avenue to pursue in the fight against rifampicin resistant *Mtb* and perhaps  
459 uncover a new paradigm for chemotherapeutic intervention. Agents that impart a considerable  
460 shock to the expression equilibrium of bacteria could exhibit potent activity against rifampicin  
461 resistant strains due to collateral sensitivity. Furthermore, when given in combination with  
462 rifampicin, such agents may act to suppress the emergence of resistance; a valuable attribute for  
463 lengthening the shelf life of rifampicin.

## 464 Methods

### 465 Strains and culture conditions

466 We used four strains described by Comas *et al.*(Comas et al., 2010): namely the wild type, clinical  
467 isolate T85 (N0155, DS), a rifampicin resistant mutant of T85 carrying the Ser450Leu mutation  
468 (N1981, RifR), a derivative of T85 that was evolved by serial passage (200 generations) in the  
469 absence of rifampicin (N1588, DS<sup>ev0</sup>) and an evolved derivative of the rifampicin resistant strains  
470 carrying an additional mutation in RpoC – Leu516Pro (N1589, RifR<sup>ev0</sup>).

471 In addition to these strains we used four clinical isolates that are part of the recently compiled  
472 Reference set of *Mtb* clinical strains(Borrell et al., 2018) covering the genetic diversity of *Mtb*.  
473 Two strains belonging to Lineage 1 (N0072, N0157) and two to Lineage 2 (N0052, N0145). We  
474 plated each of these strains on 7H10 plates containing 5 µg/ml Rifampicin, and picked colonies  
475 of spontaneous mutants. We checked the rifampicin-resistance conferring mutations using Sanger  
476 sequencing of the amplified RRDR region (Forward primer:  
477 TCGGCGAGCTGATCCAAAACCA, Reverse primer: ACGTCCATGTAGTCCACCTCAG,  
478 product size: 601 bp), and kept a Ser450Leu derivative of each clinical strain (N2027, N2030,  
479 N2495 and N1888, respectively).

480 Bacteria were cultured in 1l bottles containing large glass beads to avoid clumping and 100 ml of  
481 media incubated at 37°C rotated continuously on a roller. Unless otherwise stated we used a  
482 modified 7H9 medium supplemented with 0.5% w/v pyruvate, 0.05% v/v tyloxapol, 0.2% w/v  
483 glucose, 0.5% bovine serum albumin (Fraction V, Roche) and 14.5 mM NaCl. Compared to the  
484 usual composition of 7H9 we omitted glycerol, tween 80, oleic acid and catalase from the

485 medium. We added 10  $\mu$ M Hemin (Sigma) when supplementing growth medium with iron. We  
486 followed growth by measuring optical density at 600 nm ( $OD_{600}$ ).

487 Fluctuation assay experiments were performed using *Mycobacterium smegmatis*, mc<sup>2</sup> 155. *M.*  
488 *smegmatis* was grown either in 10 ml cultures within 50 ml Falcon conical tubes in a shaker  
489 incubator (37°C, 200 rpm), or as 200  $\mu$ l aliquots within flat-bottomed 96-well plates at 37°C and  
490 shaken at 200 rpm. We followed growth by measuring  $OD_{600}$ . We used unmodified 7H9 medium  
491 or medium where glycerol was replaced with citrate or acetate added at concentrations that  
492 matched the molarity of carbon.

### 493 **Fitness determination**

494 *Mtb* fitness was determined by comparative growth rate estimation. We grew bacteria as  
495 described and followed their growth by measuring  $OD_{600}$  with a Ultraspec 10 (GE Lifesciences).  
496 We transformed the optical density measurements using logarithm base 2 and trimmed all early  
497 and late data points that deviated from the linear correlation expected for exponential growth.  
498 Next, we fitted a linear mixed effect regression model to the data. Fitness cost was calculated as  
499 the resistance imposed deviation from wild type growth dynamics.

500 For *M. smegmatis*, we determined the growth rates by culturing bacteria as described above. We  
501 monitored the increase in  $OD_{600}$  using a Tecan M200 Pro Nanoquant at 20 min intervals. The  
502 data were log<sub>2</sub>-transformed, trimmed to retain only the portion of data pertinent to exponential  
503 growth and used for fitting a mixed effect linear regression model to estimate growth parameters.

### 504 **Transcriptional analysis with RNAseq**

505 We transferred a 40 ml aliquot of bacterial culture in mid-log phase ( $OD_{600} = 0.5 \pm 0.1$ ) into a  
506 50ml Falcon conical tube containing 10 ml ice. We harvested the cells by centrifugation (3,000 $\times g$ ,  
507 7 min, 4°C), re-suspended the pellet in 1 ml of RNApro solution (MP Biomedicals) and  
508 transferred the suspension to a Lysing matrix B tube (MP Biomedicals). We disrupted the  
509 bacterial cells using a FastPrep24 homogeniser (40s, intensity setting 6.0, MP Biomedicals). We  
510 clarified the lysate by centrifugation (12,000 $\times g$ , 5 min, 4°C), transferred the supernatant to a clean  
511 tube and added chloroform. We separated the phases by centrifugation (12,000 $\times g$ , 5 min, 4°C)  
512 and precipitated the nucleic acids from the aqueous phase by adding ethanol and incubating at -  
513 20C overnight. We performed a second acid phenol extraction to enrich for RNA. We treated  
514 our samples with DNase I Turbo (Ambion), and removed stable RNAs by using the RiboZero  
515 Gram Positive ribosomal RNA depletion kit (Epicentre). We prepared the sequencing libraries  
516 using the TruSeq stranded Total RNA kit (Illumina) and sequenced on a HiSeq2500 high output  
517 run (50 cycles, single end).

518 Illumina short reads were mapped to the *Mtb* H37Rv reference genome using BWA(Li and  
519 Durbin, 2010) (ver 0.7.13); the resulting mapping files were processed with samtools(Li et al.,  
520 2009) (ver 1.3.1). Per-feature read counts were performed using the Python module htseq-  
521 count(Anders et al., 2015) (ver 0.6.1p1) and Python (ver 2.7.11). We performed differential  
522 expression analysis using the R package DESeq2(Love et al., 2014) (ver 1.16.1) and R (ver 3.4.0).  
523 In the case of the identification of the signature of compensation we performed a comparison of  
524 RifR vs DS + DS<sup>evo</sup> + RifR<sup>evo</sup>. For the follow-up experiments we performed two separate  
525 comparisons: (DR<sup>N0072</sup> + DR<sup>N0157</sup> + DR<sup>N0052</sup> + DR<sup>N0145</sup> + DR<sup>N0155</sup>) vs (DS<sup>N0072</sup> + DS<sup>N0157</sup> + DS<sup>N0052</sup>  
526 + DS<sup>N0145</sup> + DS<sup>N0155</sup>) as well as individual DR vs DS comparisons.

527 Gene set enrichment analysis was based on functional annotation from the Kyoto Encyclopaedia  
528 of Genes and Genomes and a custom collation of curated gene sets based on published reports.  
529 The overrepresentation analysis was based on Fisher's exact as the discriminating test.

530 In addition we transformed per-feature counts into transcript counts per million bases (TPM).  
531 TPM for each feature for each sample were calculated using the following formula:

$$TPM_i = \frac{\frac{counts_i}{size_i}}{\sum_j^n \frac{counts_j}{size_j}}$$

532 Where  $counts_i$  refers to the number of reads that map to a feature  $i$ , and  $size_i$  refers to the length (in  
533 bp) of feature  $i$ . This ratio was normalized by dividing by the sum of all the ratios across all the  
534 features.

### 535 Proteomic analysis with SWATH-MS

536 We harvested 20 OD<sub>600</sub> equivalents from mid-log phase (OD<sub>600</sub> = 0.5 ± 0.1) bacterial cultures by  
537 centrifugation (3,000×g, 7 min, 4°C). We washed the bacterial pellet twice with phosphate  
538 buffered saline (PBS) to remove residues of tyloxapol. We re-suspended the bacterial pellet in 500  
539 µl of protein lysis buffer (8M Urea, 0.1 M Ammonium bicarbonate, 0.1% RapiGest [Waters]) and  
540 transferred the suspension to a Lysing matrix B tube (MP Biomedicals). We disrupted the  
541 bacterial cells using a FastPrep24 homogeniser (40s, intensity setting 6.0, MP Biomedicals). We  
542 clarified the lysate by centrifugation (12,000×g, 5 min, 4°C), and sterilised the supernatant by  
543 passing it twice through a 0.22 µm syringe filters (Milipore).

544 Following protein extraction for each sample, we used trypsin to digest proteins into peptides  
545 and then desalted them using C<sub>18</sub> columns (The Nest Group). The cleaned up peptides were re-  
546 suspended in MS buffer (2% v/v acetonitrile, 0.1% v/v formic acid). Finally, the RT-kit

547 (Biognosis) containing 11 iRT retention time normalization peptides was spiked in to every  
548 sample.

549 We measured every sample in sequential window acquisition of all theoretical mass spectra  
550 (SWATH) mode, a data independent acquisition implementation, on a tripleTOF 5600 mass  
551 spectrometer (AB Sciex) coupled to a nano flow HPLC system with the gradient of one  
552 hour(Banaei-Esfahani et al., 2017). The raw files acquired through a 64 variable width window  
553 precursor isolation scheme were centroid normalized using Proteowizard msconvert. We used  
554 the *Mtb* spectral library described earlier(Schubert et al., 2013) to extract data using the  
555 OpenSWATH workflow(Reiter et al., 2011; Rost et al., 2014; Rost et al., 2016). The processed  
556 data were filtered by MAYU to 1% protein FDR(Reiter et al., 2009). R packages aLFQ and  
557 MSstats were used for protein quantification (Top3 peptides and top5 fragment ions(Schubert et  
558 al., 2015)) and differential expression analysis respectively(Choi et al., 2014; Rosenberger et al.,  
559 2014).

#### 560 **Mycobactin determination**

561 We harvested 5 OD<sub>600</sub> equivalents from mid-log phase (OD<sub>600</sub> = 0.5 ± 0.1) bacterial cultures by  
562 centrifugation (3,000×g, 7 min, 4°C). We washed the bacterial pellet three times with 15ml of  
563 cold, sterile 7H9 medium base devoid of additives (BD) to remove residues of tyloxapol. After  
564 washing we resuspended the pellets in 80 µl of cold, sterile 7H9 medium base and added 750 µl  
565 of 1:2 Chloroform:Methanol. We vortexed the samples for 5 minutes at top speed and added 750  
566 µl of Chloroform. The samples were shaken for 1.5h at room temperature and clarified by  
567 centrifugation (16,000 × g, 10 min). We transferred the organic phase to a fresh tube, dried the  
568 samples in a speedvac and re-suspended each sample in 120 µl of 44:44:2  
569 Acetonitrile:Methanol:H<sub>2</sub>O, (v:v:v).

570 Chromatographic separation and analysis by mass spectrometry was done using a 1200 series  
571 HPLC system with a Phenomenex Kinetex column (1.7 µl × 100 mm × 2.1 mm) with a  
572 SecurityGuard Ultra (Part No: AJ-9000) coupled to an Agilent Technologies 6550 Accurate-Mass  
573 Q-ToF. Solvent A: H<sub>2</sub>O, 10mM ammonium acetate; Solvent B: acetonitrile, 10mM ammonium  
574 acetate. 10 µl of extract were injected and the column (C18) was eluted at 1.125 ml/min. Initial  
575 conditions were 60% solvent B: 0-2 min, 95% B; 2-4 min, 60% B; 4-5 min at initial conditions.  
576 Spectra were collected in negative ion mode from 50 – 3200mz. Continuous infusion of  
577 calibrants (Agilent compounds HP-321, HP-921, HP-1821) ensured exact masses over the whole  
578 mass range.

579 We converted the raw data files to the mzML format using msConvert and processed them in R  
580 using the XCMS(Smith et al., 2006) (ver 3.0.2). We extracted targeted ion chromatograms with  
581 CAMERA(Kuhl et al., 2012) (ver 1.34.0).

## 582 **Transcriptional module analysis.**

583 The iron-responsive sub-graph of the global gene regulation network published by Peterson *et*  
584 *al.*(Peterson et al., 2014), was generated by using all expression modules and all iron-responsive  
585 genes as nodes, with edges connecting them representing module membership. All other gene  
586 nodes were discarded, keeping only the information pertinent to the number of genes present in  
587 each module (its degree). We focused explicitly on modules with at least 3 IdeR-dependent iron-  
588 responsive genes within them. Finally we marked significant differential expression of the gene  
589 nodes in every comparison.

590 For the purposes of contextualising the expressional profiling of RpoB Ser450Leu we selected a  
591 subset of expression modules as follows: first we collated all the genes that were differentially  
592 expressed in at least one genetic background as determined by pairwise comparisons. We then  
593 scored each expression module for enrichment of membership by differentially expressed genes  
594 using a binomial test. We retained all modules for which the test pointed to an excess of  
595 differentially regulated genes ( $p < 0.05$ ). We constructed a new sub-graph of the global regulatory  
596 network using all enriched modules and their constituent genes irrespective of whether or not  
597 individual genes were significantly differentially expressed. Edges reflected module membership.  
598 We added expression information in the form of log-fold changes of abundance to each  
599 subgraph based on pairwise analyses.

## 600 **Calculation of genetic distance between clinical isolates**

601 Genetic distance between strains was defined as the number of single nucleotide variants (SNV)  
602 that separate two strains. The numeric value of this parameter was extracted from the phylogeny  
603 published elsewhere(Borrell et al., 2018).

## 604 **Quantification of the relative impact of the *rpoB* mutation on gene expression in 605 different clinical isolates**

606 We define the dissimilarity in the expressional response to the presence of the *rpoB* mutation  
607 using three metrics: absolute number of shared significantly differentially expressed genes, the  
608 fraction of both the shared significantly differentially expressed genes and shared non-affected  
609 genes (hamming distance) and the Euclidean distance between ratios of TPM. The first is simply  
610 the number of shared genes that were found to be significantly affected by the presence of the  
611 *rpoB* mutation in two different genetic backgrounds. For the second we use the same input to



612 calculate the hamming distance between the patterns of genes significantly affected by the  
613 mutation in *rpoB* in two different genetic backgrounds. In the third case we first calculate the  
614 TPM. We then calculate the mean TPM for each gene across the biological replicates as well as  
615 the ratio of mutant to wild type mean TPM for every gene. This gives us a vector containing 4000  
616 ratios for each mutant-wild type pair. Finally we calculate the Euclidean distance between these  
617 vectors for the different genetic backgrounds. We plotted each of these metrics against genetic  
618 distance and calculated the spearman correlation and the coefficient of variance: standard  
619 deviation over mean multiplied by 100 ( $\sigma / \mu \times 100\%$ ).

## 620 Quantification of the absolute impact of the *rpoB* mutation on gene expression of a 621 clinical isolate

622 We used transcript counts per million bases (TPM) and label free quantification (LFQ) to  
623 generate an RNA vector and a protein vector containing all the available information for each  
624 measured sample. We then calculated all the possible DS – RifR pairwise Euclidean distances for  
625 the RNA and protein vectors within each genetic background. We used the mean and standard  
626 deviation for the dissimilarity estimates. We evaluated the correlation between the fitness cost of  
627 RpoB mutations and the expression distance using the R<sup>2</sup>-coefficient derived from ordinary least  
628 squares linear regression as well as the Spearman correlation. Arbitrary units expressing the  
629 dissimilarity were obtained by dividing the calculated distances by 500,000 or 10,000,000 for TPM  
630 and LFQ, respectively.

## 631 Estimation of the biosynthetic cost of protein production

632 The calculation of biosynthetic cost was based on the molecular weight of amino acids  
633 (MW)(Seligmann, 2003) or on the estimate of *E. coli* ATP investment into individual amino acids  
634 derived by Akashi *et al.*(Akashi and Gojobori, 2002) using the following formulae:

$$p_i = LFQ_{i,X} \times \sum_{j=1}^k \alpha_j^{MW} \quad \text{or} \quad p_i = LFQ_{i,X} \times \sum_{j=1}^k \alpha_j^{ATP}$$

$$P_X = \sum_i^n p_i$$

635 Where the cost of protein *i* ( $p_i$ ) was calculated as the sum of the cost for each constituent amino  
636 acid ( $\alpha_j^{MW/ATP}$ ) based either on its molecular weight (*MW*) or ATP investment (*ATP*) and adjusted  
637 by the proportional contribution of protein *i* to the total proteome of sample *X* ( $LFQ_{i,X}$ ). The  
638 overall cost of the proteome *P* for a sample *X* ( $P_X$ ) is expressed as the sum of the costs of  
639 individual proteins ( $p$ ). The difference between the biosynthetic investments in the proteome of

640 sample X when compared to sample Y was simply:  $P_X - P_Y$ . We estimated the biosynthetic  
641 perturbation of RpoB Ser450Leu within a genetic background, by resampling sample-specific  
642 proteome costs for DS and RifR with replacement 100-times, and using the median as well as the  
643 3<sup>rd</sup> and 98<sup>th</sup> quantiles to provide the 95% confidence interval. Finally, we quantify the correlation  
644 with the relative fitness of RpoB Ser450Leu by calculating the Spearman coefficient.

#### 645 **Minimum inhibitory concentration determination**

646 We used the microplate alamar blue assay(Franzblau et al., 1998) to determine the minimum  
647 inhibitory concentrations of bedaquiline in all drug susceptible and drug resistant strains used in  
648 our study. We tested bedaquiline using a two-fold dilution series spanning a concentration of 4  
649 ng/ml – 1 µg/ml.

#### 650 **Fluctuation Assay for determining the frequency of rifampicin resistance**

651 We used the Luria-Delbrück fluctuation assay(Luria and Delbruck, 1943) to determine the  
652 frequency of rifampicin resistance in *Mycobacterium smegmatis*. Briefly, we inoculated 30 parallel  
653 cultures containing 10 ml of modified Middlebrook 7H9 medium containing either glycerol,  
654 citrate or acetate as the main carbon source with 5000 colony forming units of pre-adapted *M.*  
655 *smegmatis*. We grew the cultures to mid-log phase ( $OD_{600}=0.5$ ) at which point we chose three  
656 cultures at random for the determination of overall population size. We harvested the remaining  
657 bacteria by centrifugation  $4000\times g$  for 7 minutes, re-suspended the cellular pellet with 500 µl of  
658 fresh Middlebrook 7H9 medium and plated onto Middlebrook 7H10 solid media supplemented  
659 with 200 µg/ml Rifampicin. Plates were incubated at 37°C for 3-4 days and scored by counting  
660 the resulting resistant colonies. We determined the population-wide number of mutants ( $m$ ) using  
661 an in house implementation of the Ma-Sandri-Sarkar maximum likelihood estimation(Sarkar et  
662 al., 1992), and adjusted it by the estimated population size to determine the frequency of  
663 resistance.

#### 664 **Quantification and statistical analysis**

665 Unless otherwise stated we preformed the analyses using Python 3.5.2 augmented with the  
666 following modules to provide additional functionality: Matplotlib (ver 2.0.0), Numpy (ver 1.12.1),  
667 Scipy (ver 0.19.0), Pandas (ver 0.20.1), statsmodels (ver 0.8.0), sklearn (ver 0.18.1), and networkX  
668 (ver 1.11). All the details pertaining to the statistical treatment of data can be found where results  
669 are described: either in the main text, figure legends or methods.

#### 670 **Data and Software availability**

671 All RNAseq data were deposited in the ArrayExpress repository of the European Bioinformatics  
672 Institute under the E-MTAB-7359 accession. The mass spectrometry proteomics data have been

673 deposited to the ProteomeXchange Consortium via the PRIDE partner repository with the  
674 dataset identifier PXD011568. These data are pertinent to Figures 2-5 and all Supplementary  
675 Figures with the exception of Figure S6.

676 A record of data analysis pertinent to this paper will be made available at  
677 [http://www.github.com/swissTPH/TBRU\\_cost\\_of\\_resistance/](http://www.github.com/swissTPH/TBRU_cost_of_resistance/).

678

## 679 Acknowledgements

680 Calculations were performed at sciCORE (<http://scicore.unibas.ch/>) scientific computing center  
681 at University of Basel, with support by the SIB - Swiss Institute of Bioinformatics. This work was  
682 supported by the SystemsX.ch project “TbX”, the National Institutes of Health project  
683 Omics4TB Disease Progression (U19 AI106761), Swiss National Science Foundation (grants  
684 310030\_166687, IZRJZ3\_164171, IZLSZ3\_170834 and CRSII5\_177163) and the European  
685 Research Council (309540-EVODRTB). The authors would like to thank Uwe Sauer and Michael  
686 Zimmermann for their input during the early stages of the project. We would like to thank  
687 Janssen Pharmaceutica NV for their kind gift of bedaquiline.

## 688 Author Contributions

689 AT, RA and SG designed the project and wrote the manuscript. AT, SMG and SB generated  
690 samples for expression profiling, mycobactin determination and measured the fitness of *Mtb*  
691 strains. JF obtained MICs for bedaquiline. SS measured the frequency of resistance in *M.*  
692 *smegmatis*. PW and MZ performed the sample acquisition and data analysis for mycobactin  
693 determination. ABE and BCC performed the sample acquisition, data processing and differential  
694 expression analysis for *Mtb* proteomes. KE and CB processed and sequenced RNAseq samples.  
695 AT performed the data analysis for RNAseq and all other aspects of computational analysis.

## 696 Declaration of Interests

697 The authors declare no competing interests.

## 698 References

699 Akashi, H., and Gojobori, T. (2002). Metabolic efficiency and amino acid composition in the  
700 proteomes of *Escherichia coli* and *Bacillus subtilis*. Proc Natl Acad Sci U S A 99, 3695-3700.

- 701 Anders, S., Pyl, P.T., and Huber, W. (2015). HTSeq--a Python framework to work with high-  
702 throughput sequencing data. *Bioinformatics* *31*, 166-169.
- 703 Andersson, D., and Hughes, D. (2008). Effects of antibiotic resistance on bacterial fitness,  
704 virulence and transmission. In *Evolutionary biology of bacterial and fungal pathogens*, F.  
705 Baquero, C. Nombela, G.H. Cassell, and J.A. Gutierrez-Fuentes, eds. (Washington, DC: ASM  
706 Press), pp. 307-318.
- 707 Andries, K., Verhasselt, P., Guillemont, J., Gohlmann, H.W., Neefs, J.M., Winkler, H., Van  
708 Gestel, J., Timmerman, P., Zhu, M., Lee, E., *et al.* (2005). A diarylquinoline drug active on the  
709 ATP synthase of *Mycobacterium tuberculosis*. *Science* *307*, 223-227.
- 710 Banaei-Esfahani, A., Nicod, C., Aebersold, R., and Collins, B.C. (2017). Systems proteomics  
711 approaches to study bacterial pathogens: application to *Mycobacterium tuberculosis*. *Curr Opin*  
712 *Microbiol* *39*, 64-72.
- 713 Basan, M., Hui, S., Okano, H., Zhang, Z., Shen, Y., Williamson, J.R., and Hwa, T. (2015).  
714 Overflow metabolism in *Escherichia coli* results from efficient proteome allocation. *Nature* *528*, 99-  
715 104.
- 716 Beste, D.J., Laing, E., Bonde, B., Avignone-Rossa, C., Bushell, M.E., and McFadden, J.J. (2007).  
717 Transcriptomic analysis identifies growth rate modulation as a component of the adaptation of  
718 mycobacteria to survival inside the macrophage. *J Bacteriol* *189*, 3969-3976.
- 719 Beste, D.J., Peters, J., Hooper, T., Avignone-Rossa, C., Bushell, M.E., and McFadden, J. (2005).  
720 Compiling a molecular inventory for *Mycobacterium bovis* BCG at two growth rates: evidence for  
721 growth rate-mediated regulation of ribosome biosynthesis and lipid metabolism. *J Bacteriol* *187*,  
722 1677-1684.
- 723 Bisson, G.P., Mehaffy, C., Broeckling, C., Prenni, J., Rifat, D., Lun, D.S., Burgos, M., Weissman,  
724 D., Karakousis, P.C., and Dobos, K. (2012). Upregulation of the phthiocerol dimycocerosate  
725 biosynthetic pathway by rifampin-resistant, *rpoB* mutant *Mycobacterium tuberculosis*. *J Bacteriol* *194*,  
726 6441-6452.
- 727 Borrell, S., and Gagneux, S. (2009). Infectiousness, reproductive fitness and evolution of drug-  
728 resistant *Mycobacterium tuberculosis*. *Int J Tuberc Lung Dis* *13*, 1456-1466.
- 729 Borrell, S., Teo, Y., Giardina, F., Streicher, E., Klopper, M., Feldmann, J., Mueller, B., Victor, T.,  
730 and Gagneux, S. (2013). Epistasis between antibiotic resistance mutations drives the evolution of  
731 extensively drug-resistant tuberculosis. *Evolution, Medicine, and Public Health* *eot003*, 65-74.
- 732 Borrell, S., and Trauner, A. (2017). Strain Diversity and the Evolution of Antibiotic Resistance.  
733 *Adv Exp Med Biol* *1019*, 263-279.
- 734 Borrell, S., Trauner, A., Brites, D., Rigouts, L., Loiseau, C., Coscolla, M., Niemann, S., De Jong,  
735 B., Yeboah-Manu, D., Kato-Maeda, M., *et al.* (2018). Reference Set of *Mycobacterium tuberculosis*  
736 Clinical Strains: A tool for research and product development. In *bioRxiv* (Cold Spring Harbor).
- 737 Campbell, E.A., Korzheva, N., Mustaev, A., Murakami, K., Nair, S., Goldfarb, A., and Darst, S.A.  
738 (2001). Structural mechanism for rifampicin inhibition of bacterial RNA polymerase. *Cell* *104*,  
739 901-912.
- 740 Casali, N., Nikolayevskyy, V., Balabanova, Y., Harris, S.R., Ignatyeva, O., Kontsevaya, I.,  
741 Corander, J., Bryant, J., Parkhill, J., Nejentsev, S., *et al.* (2014). Evolution and transmission of  
742 drug-resistant tuberculosis in a Russian population. *Nat Genet* *46*, 279-286.
- 743 Choi, M., Chang, C.Y., Clough, T., Broudy, D., Killeen, T., MacLean, B., and Vitek, O. (2014).  
744 MSstats: an R package for statistical analysis of quantitative mass spectrometry-based proteomic  
745 experiments. *Bioinformatics* *30*, 2524-2526.
- 746 Comas, I., Borrell, S., Roetzer, A., Rose, G., Malla, B., Kato-Maeda, M., Galagan, J., Niemann, S.,  
747 and Gagneux, S. (2012). Whole-genome sequencing of rifampicin-resistant *Mycobacterium*  
748 *tuberculosis* strains identifies compensatory mutations in RNA polymerase genes. *Nat Genet* *44*,  
749 106-110.
- 750 Comas, I., Chakravarti, J., Small, P.M., Galagan, J., Niemann, S., Kremer, K., Ernst, J.D., and  
751 Gagneux, S. (2010). Human T cell epitopes of *Mycobacterium tuberculosis* are evolutionarily  
752 hyperconserved. *Nat Genet* *42*, 498-503.

- 753 Coscolla, M., and Gagneux, S. (2014). Consequences of genomic diversity in *Mycobacterium*  
754 *tuberculosis*. *Semin Immunol* 26, 431-444.
- 755 de Vos, M., Muller, B., Borrell, S., Black, P.A., van Helden, P.D., Warren, R.M., Gagneux, S., and  
756 Victor, T.C. (2013). Putative compensatory mutations in the *rpoC* gene of rifampin-resistant  
757 *Mycobacterium tuberculosis* are associated with ongoing transmission. *Antimicrob Agents Chemother*  
758 57, 827-832.
- 759 du Preez, I., and Loots du, T. (2012). Altered fatty acid metabolism due to rifampicin-resistance  
760 conferring mutations in the *rpoB* Gene of *Mycobacterium tuberculosis*: mapping the potential of  
761 pharmaco-metabolomics for global health and personalized medicine. *OMICS* 16, 596-603.
- 762 Ehrenberg, M., Bremer, H., and Dennis, P.P. (2013). Medium-dependent control of the bacterial  
763 growth rate. *Biochimie* 95, 643-658.
- 764 Farhat, M.R., Shapiro, B.J., Kieser, K.J., Sultana, R., Jacobson, K.R., Victor, T.C., Warren, R.M.,  
765 Streicher, E.M., Calver, A., Sloutsky, A., *et al.* (2013). Genomic analysis identifies targets of  
766 convergent positive selection in drug-resistant *Mycobacterium tuberculosis*. *Nat Genet* 45, 1183-1189.
- 767 Ford, C.B., Shah, R.R., Maeda, M.K., Gagneux, S., Murray, M.B., Cohen, T., Johnston, J.C.,  
768 Gardy, J., Lipsitch, M., and Fortune, S.M. (2013). *Mycobacterium tuberculosis* mutation rate estimates  
769 from different lineages predict substantial differences in the emergence of drug-resistant  
770 tuberculosis. *Nat Genet* 45, 784-790.
- 771 Franzblau, S.G., Witzig, R.S., McLaughlin, J.C., Torres, P., Madico, G., Hernandez, A., Degnan,  
772 M.T., Cook, M.B., Quenzer, V.K., Ferguson, R.M., *et al.* (1998). Rapid, low-technology MIC  
773 determination with clinical *Mycobacterium tuberculosis* isolates by using the microplate Alamar Blue  
774 assay. *J Clin Microbiol* 36, 362-366.
- 775 Gagneux, S. (2018). Ecology and evolution of *Mycobacterium tuberculosis*. *Nat Rev Microbiol* 16,  
776 202-213.
- 777 Gagneux, S., Long, C.D., Small, P.M., Van, T., Schoolnik, G.K., and Bohannon, B.J. (2006). The  
778 competitive cost of antibiotic resistance in *Mycobacterium tuberculosis*. *Science* 312, 1944-1946.
- 779 Gourse, R.L., Gaal, T., Bartlett, M.S., Appleman, J.A., and Ross, W. (1996). rRNA transcription  
780 and growth rate-dependent regulation of ribosome synthesis in *Escherichia coli*. *Annu Rev*  
781 *Microbiol* 50, 645-677.
- 782 Grandjean, L., Gilman, R.H., Martin, L., Soto, E., Castro, B., Lopez, S., Coronel, J., Castillo, E.,  
783 Alarcon, V., Lopez, V., *et al.* (2015). Transmission of Multidrug-Resistant and Drug-Susceptible  
784 Tuberculosis within Households: A Prospective Cohort Study. *PLoS Med* 12, e1001843;  
785 discussion e1001843.
- 786 Gygli, S.M., Borrell, S., Trauner, A., and Gagneux, S. (2017). Antimicrobial resistance in  
787 *Mycobacterium tuberculosis*: mechanistic and evolutionary perspectives. *FEMS Microbiol Rev*.
- 788 Holmes, A.H., Moore, L.S., Sundsfjord, A., Steinbakk, M., Regmi, S., Karkey, A., Guerin, P.J.,  
789 and Piddock, L.J. (2016). Understanding the mechanisms and drivers of antimicrobial resistance.  
790 *Lancet* 387, 176-187.
- 791 Jones, C.M., Wells, R.M., Madduri, A.V., Renfrow, M.B., Ratledge, C., Moody, D.B., and  
792 Niederweis, M. (2014). Self-poisoning of *Mycobacterium tuberculosis* by interrupting siderophore  
793 recycling. *Proc Natl Acad Sci U S A* 111, 1945-1950.
- 794 Karpinets, T.V., Greenwood, D.J., Sams, C.E., and Ammons, J.T. (2006). RNA:protein ratio of  
795 the unicellular organism as a characteristic of phosphorous and nitrogen stoichiometry and of the  
796 cellular requirement of ribosomes for protein synthesis. *BMC Biol* 4, 30.
- 797 Kuhl, C., Tautenhahn, R., Bottcher, C., Larson, T.R., and Neumann, S. (2012). CAMERA: an  
798 integrated strategy for compound spectra extraction and annotation of liquid  
799 chromatography/mass spectrometry data sets. *Anal Chem* 84, 283-289.
- 800 Lahiri, N., Shah, R.R., Layre, E., Young, D., Ford, C., Murray, M.B., Fortune, S.M., and Moody,  
801 D.B. (2016). Rifampin Resistance Mutations Are Associated with Broad Chemical Remodeling of  
802 *Mycobacterium tuberculosis*. *J Biol Chem* 291, 14248-14256.
- 803 Laxminarayan, R., Matsoso, P., Pant, S., Brower, C., Rottingen, J.A., Klugman, K., and Davies, S.  
804 (2016). Access to effective antimicrobials: a worldwide challenge. *Lancet* 387, 168-175.

805 Li, H., and Durbin, R. (2010). Fast and accurate long-read alignment with Burrows-Wheeler  
806 transform. *Bioinformatics* 26, 589-595.

807 Li, H., Handsaker, B., Wysoker, A., Fennell, T., Ruan, J., Homer, N., Marth, G., Abecasis, G.,  
808 and Durbin, R. (2009). The Sequence Alignment/Map format and SAMtools. *Bioinformatics* 25,  
809 2078-2079.

810 Love, M.I., Huber, W., and Anders, S. (2014). Moderated estimation of fold change and  
811 dispersion for RNA-seq data with DESeq2. *Genome Biol* 15, 550.

812 Luria, S.E., and Delbruck, M. (1943). Mutations of bacteria from virus sensitivity to virus  
813 resistance. *Genetics* 28, 491-511.

814 Melnyk, A.H., Wong, A., and Kassen, R. (2015). The fitness costs of antibiotic resistance  
815 mutations. *Evol Appl* 8, 273-283.

816 Minch, K.J., Rustad, T.R., Peterson, E.J., Winkler, J., Reiss, D.J., Ma, S., Hickey, M., Brabant, W.,  
817 Morrison, B., Turkarslan, S., *et al.* (2015). The DNA-binding network of *Mycobacterium tuberculosis*.  
818 *Nat Commun* 6, 5829.

819 Molodtsov, V., Scharf, N.T., Stefan, M.A., Garcia, G.A., and Murakami, K.S. (2017). Structural  
820 basis for rifamycin resistance of bacterial RNA polymerase by the three most clinically important  
821 RpoB mutations found in *Mycobacterium tuberculosis*. *Mol Microbiol* 103, 1034-1045.

822 O'Neill, J. (2016). Review on Antimicrobial Resistance. Tackling Drug-Resistant Infections  
823 Globally: Final Report and Recommendations. J. O'Neill, ed. (London, Wellcome Trust and UK  
824 Government), p. 84.

825 Park, H.D., Guinn, K.M., Harrell, M.I., Liao, R., Voskuil, M.I., Tompa, M., Schoolnik, G.K., and  
826 Sherman, D.R. (2003). Rv3133c/*dosR* is a transcription factor that mediates the hypoxic response  
827 of *Mycobacterium tuberculosis*. *Mol Microbiol* 48, 833-843.

828 Peterson, E.J., Reiss, D.J., Turkarslan, S., Minch, K.J., Rustad, T., Plaisier, C.L., Longabaugh,  
829 W.J., Sherman, D.R., and Baliga, N.S. (2014). A high-resolution network model for global gene  
830 regulation in *Mycobacterium tuberculosis*. *Nucleic Acids Res* 42, 11291-11303.

831 Qi, Q., Preston, G.M., and MacLean, R.C. (2014). Linking system-wide impacts of RNA  
832 polymerase mutations to the fitness cost of rifampin resistance in *Pseudomonas aeruginosa*. *MBio* 5,  
833 e01562.

834 Reddy, P.V., Puri, R.V., Chauhan, P., Kar, R., Rohilla, A., Khera, A., and Tyagi, A.K. (2013).  
835 Disruption of mycobactin biosynthesis leads to attenuation of *Mycobacterium tuberculosis* for growth  
836 and virulence. *J Infect Dis* 208, 1255-1265.

837 Reiter, L., Claassen, M., Schrimpf, S.P., Jovanovic, M., Schmidt, A., Buhmann, J.M., Hengartner,  
838 M.O., and Aebersold, R. (2009). Protein identification false discovery rates for very large  
839 proteomics data sets generated by tandem mass spectrometry. *Mol Cell Proteomics* 8, 2405-2417.

840 Reiter, L., Rinner, O., Picotti, P., Huttenhain, R., Beck, M., Brusniak, M.Y., Hengartner, M.O.,  
841 and Aebersold, R. (2011). mProphet: automated data processing and statistical validation for  
842 large-scale SRM experiments. *Nat Methods* 8, 430-435.

843 Reynolds, M.G. (2000). Compensatory evolution in rifampin-resistant *Escherichia coli*. *Genetics*  
844 156, 1471-1481.

845 Rodriguez, G.M., Voskuil, M.I., Gold, B., Schoolnik, G.K., and Smith, I. (2002). *ideR*, An  
846 essential gene in *Mycobacterium tuberculosis*: role of IdeR in iron-dependent gene expression, iron  
847 metabolism, and oxidative stress response. *Infect Immun* 70, 3371-3381.

848 Rosenberger, G., Ludwig, C., Rost, H.L., Aebersold, R., and Malmstrom, L. (2014). aLFQ: an R-  
849 package for estimating absolute protein quantities from label-free LC-MS/MS proteomics data.  
850 *Bioinformatics* 30, 2511-2513.

851 Rost, H.L., Rosenberger, G., Navarro, P., Gillet, L., Miladinovic, S.M., Schubert, O.T., Wolski,  
852 W., Collins, B.C., Malmstrom, J., Malmstrom, L., *et al.* (2014). OpenSWATH enables automated,  
853 targeted analysis of data-independent acquisition MS data. *Nat Biotechnol* 32, 219-223.

854 Rost, H.L., Sachsenberg, T., Aiche, S., Bielow, C., Weissner, H., Aicheler, F., Andreotti, S., Ehrlich,  
855 H.C., Gutenbrunner, P., Kenar, E., *et al.* (2016). OpenMS: a flexible open-source software  
856 platform for mass spectrometry data analysis. *Nat Methods* 13, 741-748.

857 Rustad, T.R., Minch, K.J., Ma, S., Winkler, J.K., Hobbs, S., Hickey, M., Brabant, W., Turkarslan,  
858 S., Price, N.D., Baliga, N.S., *et al.* (2014). Mapping and manipulating the *Mycobacterium tuberculosis*  
859 transcriptome using a transcription factor overexpression-derived regulatory network. *Genome*  
860 *Biol* *15*, 502.

861 Sarkar, S., Ma, W.T., and Sandri, G.H. (1992). On fluctuation analysis: a new, simple and efficient  
862 method for computing the expected number of mutants. *Genetica* *85*, 173-179.

863 Schubert, O.T., Ludwig, C., Kogadeeva, M., Zimmermann, M., Rosenberger, G., Gengenbacher,  
864 M., Gillet, L.C., Collins, B.C., Rost, H.L., Kaufmann, S.H., *et al.* (2015). Absolute Proteome  
865 Composition and Dynamics during Dormancy and Resuscitation of *Mycobacterium tuberculosis*. *Cell*  
866 *host & microbe* *18*, 96-108.

867 Schubert, O.T., Mouritsen, J., Ludwig, C., Rost, H.L., Rosenberger, G., Arthur, P.K., Claassen,  
868 M., Campbell, D.S., Sun, Z., Farrah, T., *et al.* (2013). The *Mtb* Proteome Library: A Resource of  
869 Assays to Quantify the Complete Proteome of *Mycobacterium tuberculosis*. *Cell host & microbe* *13*,  
870 602-612.

871 Scott, M., Gunderson, C.W., Mateescu, E.M., Zhang, Z., and Hwa, T. (2010). Interdependence of  
872 cell growth and gene expression: origins and consequences. *Science* *330*, 1099-1102.

873 Seligmann, H. (2003). Cost-minimization of amino acid usage. *J Mol Evol* *56*, 151-161.

874 Smith, C.A., Want, E.J., O'Maille, G., Abagyan, R., and Siuzdak, G. (2006). XCMS: processing  
875 mass spectrometry data for metabolite profiling using nonlinear peak alignment, matching, and  
876 identification. *Anal Chem* *78*, 779-787.

877 Song, T., Park, Y., Shamputa, I.C., Seo, S., Lee, S.Y., Jeon, H.S., Choi, H., Lee, M., Glynn, R.J.,  
878 Barnes, S.W., *et al.* (2014). Fitness costs of rifampicin resistance in *Mycobacterium tuberculosis* are  
879 amplified under conditions of nutrient starvation and compensated by mutation in the beta'  
880 subunit of RNA polymerase. *Mol Microbiol* *91*, 1106-1119.

881 Stefan, M.A., Ugur, F.S., and Garcia, G.A. (2018). Source of the Fitness Defect in Rifamycin-  
882 Resistant *Mycobacterium tuberculosis* RNA Polymerase and the Mechanism of Compensation by  
883 Mutations in the beta' Subunit. *Antimicrob Agents Chemother* *62*.

884 Thiele, I., Jamshidi, N., Fleming, R.M., and Palsson, B.O. (2009). Genome-scale reconstruction of  
885 *Escherichia coli*'s transcriptional and translational machinery: a knowledge base, its mathematical  
886 formulation, and its functional characterization. *PLoS Comput Biol* *5*, e1000312.

887 Wells, R.M., Jones, C.M., Xi, Z., Speer, A., Danilchanka, O., Doornbos, K.S., Sun, P., Wu, F.,  
888 Tian, C., and Niederweis, M. (2013). Discovery of a siderophore export system essential for  
889 virulence of *Mycobacterium tuberculosis*. *PLoS Pathog* *9*, e1003120.

890 WHO (2017). *Global Tuberculosis Report 2017*. (Geneva, World Health Organization), p. 147.

891 Ycart, B. (2013). Fluctuation analysis: can estimates be trusted? *PLoS ONE* *8*, e80958.

892 Zaneveld, J.R., McMinds, R., and Vega Thurber, R. (2017). Stress and stability: applying the Anna  
893 Karenina principle to animal microbiomes. *Nat Microbiol* *2*, 17121.

894 Zhang, H., Li, D., Zhao, L., Fleming, J., Lin, N., Wang, T., Liu, Z., Li, C., Galwey, N., Deng, J., *et*  
895 *al.* (2013). Genome sequencing of 161 *Mycobacterium tuberculosis* isolates from China identifies  
896 genes and intergenic regions associated with drug resistance. *Nat Genet* *45*, 1255-1260.

897
